# Supplementary material for: ZmASR3 from the Maize ASR Gene Family Positively Regulates Drought Tolerance in Transgenic Arabidopsis
Source: PubMed Central journal article supplement (PMC6539908; doi:10.3390/ijms20092278), 2019-05-08
Supplement: ijms-20-02278-s001.pdf [file ijms-20-02278-s001.pdf]

**Table S1.** The molecular features of ASR genes.

| Gene name | Gene identifier    | ORF(aa) | MW(Da)   | pI    | chromosome | Chromosomal localization |           |
|-----------|--------------------|---------|----------|-------|------------|--------------------------|-----------|
|           |                    |         |          |       |            | Star                     | End       |
| ZmASR1    | GRMZM2G136910_T01  | 417     | 15542.85 | 5.89  | Zm10       | 8852553                  | 8853933   |
| ZmASR2    | GRMZM5G854138_T02  | 396     | 14904.22 | 6.15  | Zm2        | 139700113                | 139701207 |
| ZmASR3    | GRMZM2G044132_T02  | 1020    | 35955.05 | 9.23  | Zm2        | 54473360                 | 54474810  |
| ZmASR4    | GRMZM2G168552_T01  | 546     | 20428.94 | 6.3   | Zm8        | 156640234                | 156641211 |
| ZmASR5    | GRMZM2G052100_T01  | 315     | 11789.99 | 6.65  | Zm10       | 116077391                | 116078438 |
| ZmASR6    | GRMZM2G057841_T01  | 321     | 11541.82 | 8.05  | Zm5        | 171162247                | 171162872 |
| ZmASR7    | GRMZM2G014797_T01  | 321     | 12077.77 | 10.56 | Zm3        | 65662114                 | 65662673  |
| ZmASR8    | GRMZM2G314075_T01  | 309     | 11460.85 | 9.66  | Zm3        | 65665421                 | 65666059  |
| ZmASR9    | GRMZM2G383699_T01  | 309     | 11412.81 | 9.78  | Zm3        | 65739867                 | 65740452  |
| OsASR1    | LOC_Os01g72910.1   | 318     | 11676.21 | 9.66  | Os1        | 42282832                 | 42283632  |
| OsASR2    | LOC_Os01g73250.1   | 549     | 20439.9  | 6.59  | Os1        | 42460555                 | 42462334  |
| OsASR3    | LOC_Os01g72900.1   | 291     | 10573.92 | 9.62  | Os1        | 42281272                 | 42281973  |
| OsASR4    | LOC_Os02g33820.1   | 318     | 11676.94 | 6.76  | Os2        | 20165589                 | 20166668  |
| OsASR5    | LOC_Os11g06720.1   | 417     | 15464.86 | 6.2   | Os11       | 3278435                  | 3279425   |
| OsASR6    | LOC_Os04g34600.1   | 690     | 24463.48 | 9.49  | Os4        | 20934819                 | 20936052  |
| SbASR1    | Sobic.008G049200.2 | 438     | 16274.65 | 5.82  | Sb8        | 4848187                  | 4849152   |
| SbASR2    | Sobic.006G078500.1 | 810     | 28483.34 | 4.92  | Sb6        | 44420519                 | 44422060  |
| SbASR3    | Sobic.005G050200.1 | 405     | 15172.49 | 6.11  | Sb5        | 4770080                  | 4771218   |
| SbASR4    | Sobic.006G078400.1 | 306     | 11545.73 | 6.65  | Sb6        | 44407316                 | 44408052  |
| SbASR5    | Sobic.003G158600.1 | 306     | 11269.64 | 9.78  | Sb3        | 18206542                 | 18206847  |
| SbASR6    | Sobic.003G158500.1 | 306     | 11865.37 | 10.19 | Sb3        | 18201190                 | 18203759  |
| SbASR7    | Sobic.003G437800.1 | 561     | 20584.15 | 6.21  | Sb3        | 73812025                 | 73813272  |
| SbASR8    | Sobic.004G171000.1 | 324     | 11911.2  | 6.98  | Sb4        | 52358175                 | 52358919  |

**Table S2.** sequences in this study.

| Use           | Primer Name | Forward Primer (5'-3')         | Reverse Primer (5'-3')             |
|---------------|-------------|--------------------------------|------------------------------------|
|               | ZmASR1      | CGGGATCC ATGGCGGAGGAGAAGCA     | GCGTCGACTCAGCCGAAGAAGTGGTG         |
|               | ZmASR2      | CGGGATCCATGTTCGGAGGAGAAGCACCAC | GCGTCGACTCAGCCGAAGAGGTGGTG         |
|               | ZmASR3      | CGGGATCCATGGCGGACGAGTACGG      | GCGTCGACCTACGTACGCAAGTAGATCGATC    |
| 1301a         | ZmASR4      | CGGGATCCATGGCCGACTACTACCACG    | GCGTCGACTCAGTCGCAGTAGTAGGAGTAGC    |
| amplification | ZmASR5      | GCTCTAGAATGTCTGAGGAGAAGCACCAC  | AACTGCAGTCAGTTGTGGGCGTGCTT         |
|               | ZmASR6      | CGGGATCCATGGCTGAGGAGAAGAAGCAC  | GCGTCGACTCAGCTCGGCCCTGCTT          |
|               | ZmASR7      | CGGGATCCATGGCGCATCACTTCTCTC    | GCGTCGACTCAGTAACTAGCTAGTGGTGGTGTGC |
|               | ZmASR8      | CGGGATCCATGGCGCATCACTTCTCTCG   | GCGTCGACCTAGTGGTGATGGTGTCCATGGT    |
|               | ZmASR9      | CGGGATCCATGGCGCACCACCTCTCT     | GCGTCGACCTAGTGGTGATGGTGTCCACG      |

|                       |                |                               |                                   |
|-----------------------|----------------|-------------------------------|-----------------------------------|
|                       | ZmASR1         | GGACTAGTATGGCGGAGGAGAAGCA     | CGGGATCCGCCGAAGAAGTGGTGCT         |
|                       | ZmASR2         | GGACTAGTATGTCCGAGGAGAAGCACCAC | CGGGATCCGCCGAAGAGGTGGTGGTGC       |
|                       | ZmASR3         | GGACTAGTATGGCGGACGAGTACGG     | CGGGATCCCGTACGCAAGTAGATCGATCG     |
|                       | ZmASR4         | GGACTAGTATGGCCGACTACTACCACG   | CGGGATCCGTCGCAGTAGTAGGAGTAGCC     |
| 1305-GFP              | ZmASR5         | GGACTAGTATGTCTGAGGAGAAGCACCAC | CGGGATCCGTTGTGGGCGTGCTTCTT        |
| amplification         | ZmASR6         | GGACTAGTATGGCTGAGGAGAAGAAGCAC | CGGGATCCGCTCTGGCCCTGCTTCTT        |
|                       | ZmASR7         | GGACTAGTATGGCGCATCACTTCCTC    | CGGGATCCGTAAGTAGTAGTGGTGGTGTCC    |
|                       | ZmASR8         | GGACTAGTATGGCGCATCACTTTCTCG   | CGGGATCCGTTGGTGTGGTGTCCATGG       |
|                       | ZmASR9         | GGACTAGTATGGCGCACCCTTCCT      | CGGGATCCGTTGGTGTGGTGTCCACGG       |
|                       |                | ZmASR1                        | CGGAATTCATGGCGGAGGAGAAGCA         |
|                       | ZmASR2         | CGGAATTCATGTCCGAGGAGAAGCACCAC | CGGGATCCTCAGCCGAAGAGGTGGTG        |
|                       | ZmASR3         | CGGAATTCATGGCGGACGAGTACGG     | CGGGATCCCTACGTACGCAAGTAGATCGATC   |
|                       | ZmASR4         | CGGAATTCATGGCCGACTACTACCACG   | CGGGATCCTCAGTCGCAGTAGTAGGAGTAGC   |
| Yeast                 | ZmASR5         | CGGAATTCATGTCTGAGGAGAAGCACCAC | CGGGATCCTCAGTTGTGGGCGTGCTT        |
| Two hybrid            | ZmASR6         | CGGAATTCATGGCTGAGGAGAAGAAGCAC | CGGGATCCTCAGCTCTGGCCCTGCTT        |
|                       | ZmASR7         | CGGAATTCATGGCGCATCACTTCCTC    | CGGGATCCTCAGTAACTAGTAGTGGTGGTGTCC |
|                       | ZmASR8         | CGGAATTCATGGCGCATCACTTTCTCG   | CGGGATCCCTAGTGGTGTGGTGTCCATGGT    |
|                       | ZmASR9         | CGGAATTCATGGCGCACCCTTCCT      | CGGGATCCCTAGTGGTGTGGTGTCCACG      |
|                       |                | ZmASR1                        | GCACTCTACGAGAAGCACGA              |
|                       | ZmASR2         | GCACTCTACGAGAAGCACGA          | TCGTGGTGCTCGTGGAAATAC             |
|                       | ZmASR3         | ACAGCGGGTACAACAGATCG          | GCTCGTTCATCAGTTCGTG C             |
|                       | ZmASR4         | CCTTTGCTCTGTACGAGGGG          | TAGTAGGAGTAGCCGTGCC               |
| qRT-PCR               | ZmASR5         | GAAGCACCACAAGCACATGG          | GTCTCCGGGTCTTCTTGG                |
|                       | ZmASR6         | AGAAGAAGCACCACCACCTG          | CTTCTTCTGGTGGTGTCTCGT             |
|                       | ZmASR7         | CCATCACTGCAGGAGCCTAC          | TGGCGTCTTCTTCTGGTGG               |
|                       | ZmASR8         | CGCACTCGACAAGATCAAG           | GGTGCTTCTTGGCGTCTTTC              |
|                       | ZmASR9         | GCCTACGCTATGCAGAGAA           | TCTGGTGTGCTCGTGGAAAG              |
|                       | AtLTP3         | GGCTTTCGCTTTGAGGTTCTTC        | ATGCTAACACCCGCACTTCCAG            |
|                       | AtSOS1         | TCATCATCCTCACAATGGCTCTAA      | ACCAACTTGGCTGGGACAACCTTA          |
| drought-related genes | Rd29B          | AGAGGTGGTGTAAACGGGTAA         | GGCTCAATGGGTTTGGTG                |
|                       | AtCAT3         | GCGTTGAAACCTAACCCGAAAA        | AAACCCCTCATGTGCCTGTAATCTT         |
|                       | AtSOD1         | TGAGGGTGTACGGGGACTATCT        | GTGAAGGTGGCAGTTCATCATCTC          |
|                       | NCED3          | CAATCATCAAACCTCTCCCGCC        | TCTCGTGGCTGACAAGGAAAC             |
|                       | Use            | Primer Name                   | Forward Primer (5'-3')            |
|                       | SnRK2.6        | ATGGATCGACCAGCAGTGAG          | GCCAAATATCCTTGACGAGTT             |
| drought-related genes | DREB2A         | GAGGACCAGAGAATAGCCGATG        | GTAATCGTAACTCAGACGCAT             |
|                       | COR15A         | CCACCGACTCCTCTCTGCTT          | AAGGGAGATTCGAGATATGAAGA           |
|                       | <i>Atactin</i> | GTCGTACAACCGGTATTGTG          | GAGCTGGTCTTTGAGGTTTC              |
|                       | <i>Zmactin</i> | GGGATTGCCGATCGTATGAG          | GAGCCACCGATCCAGACACT              |

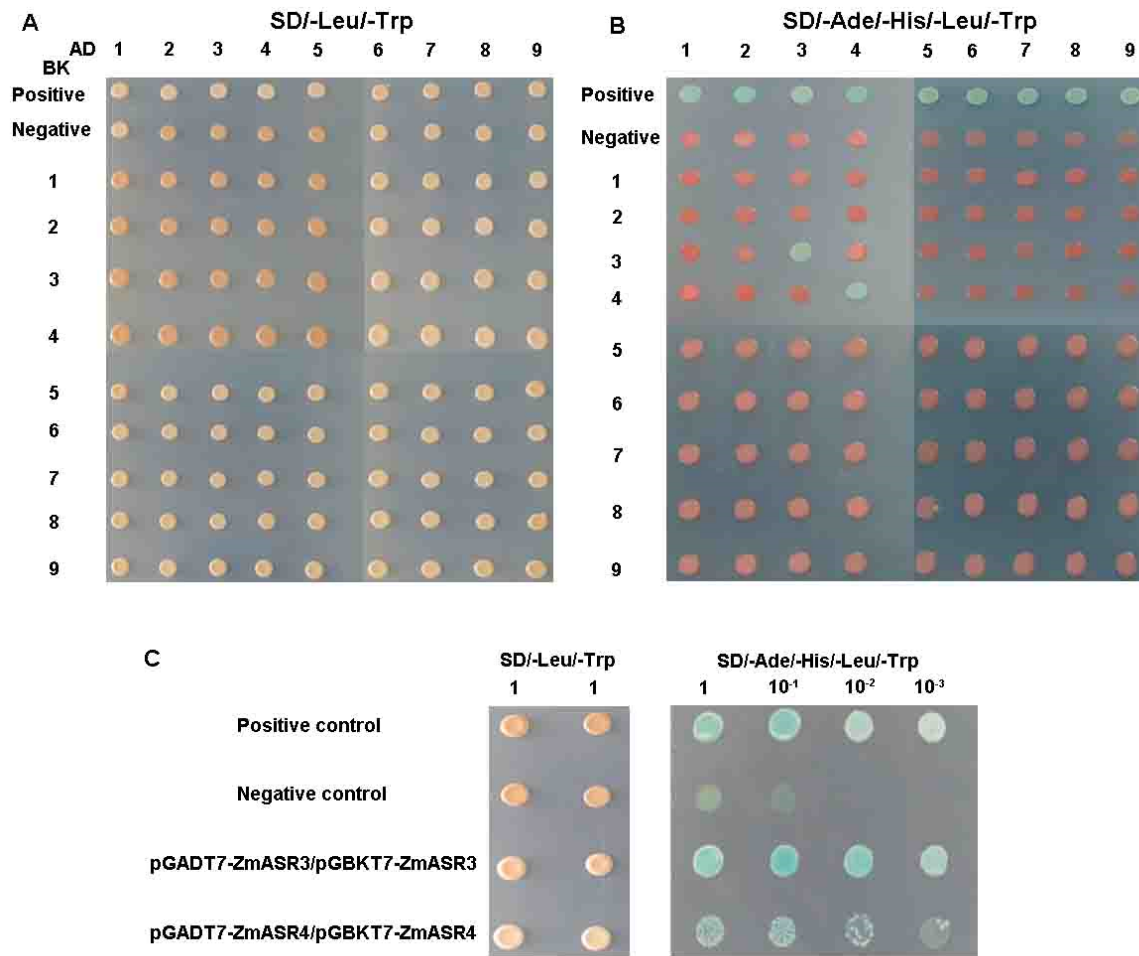

**Figure S1.** ZmASR3 and ZmASR4 can form the homodimer in yeast. Positive control: pGBKT7-53 + pGADT7-T; Negative control: pGBKT7 + pGADT7. 1: ZmASR1, 2: ZmASR2, 3: ZmASR3, 4: ZmASR4, 5: ZmASR5, 6: ZmASR6, 7: ZmASR7, 8: ZmASR8, 9: ZmASR9.

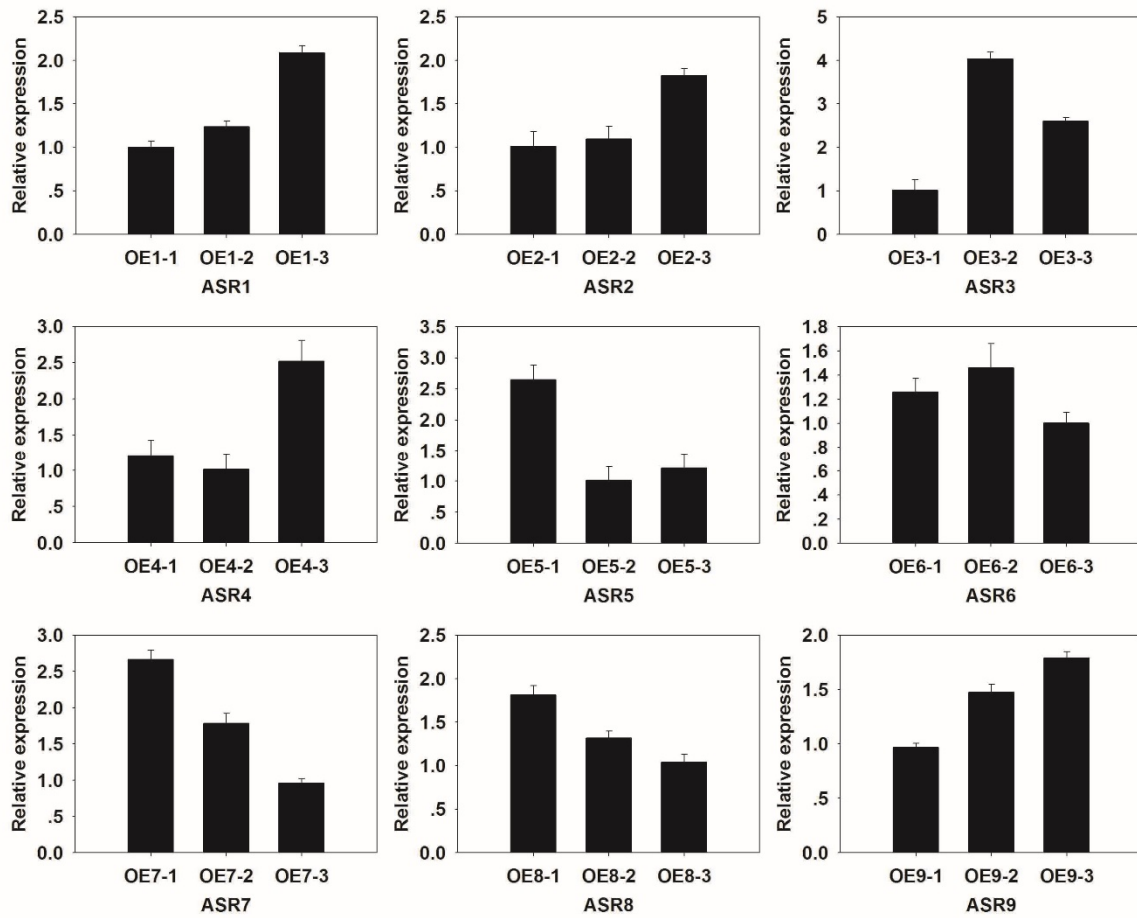

Figure S2. Expression analysis of *ZmASRs* in transgenic *Arabidopsis* assessed by qRT-PCR.

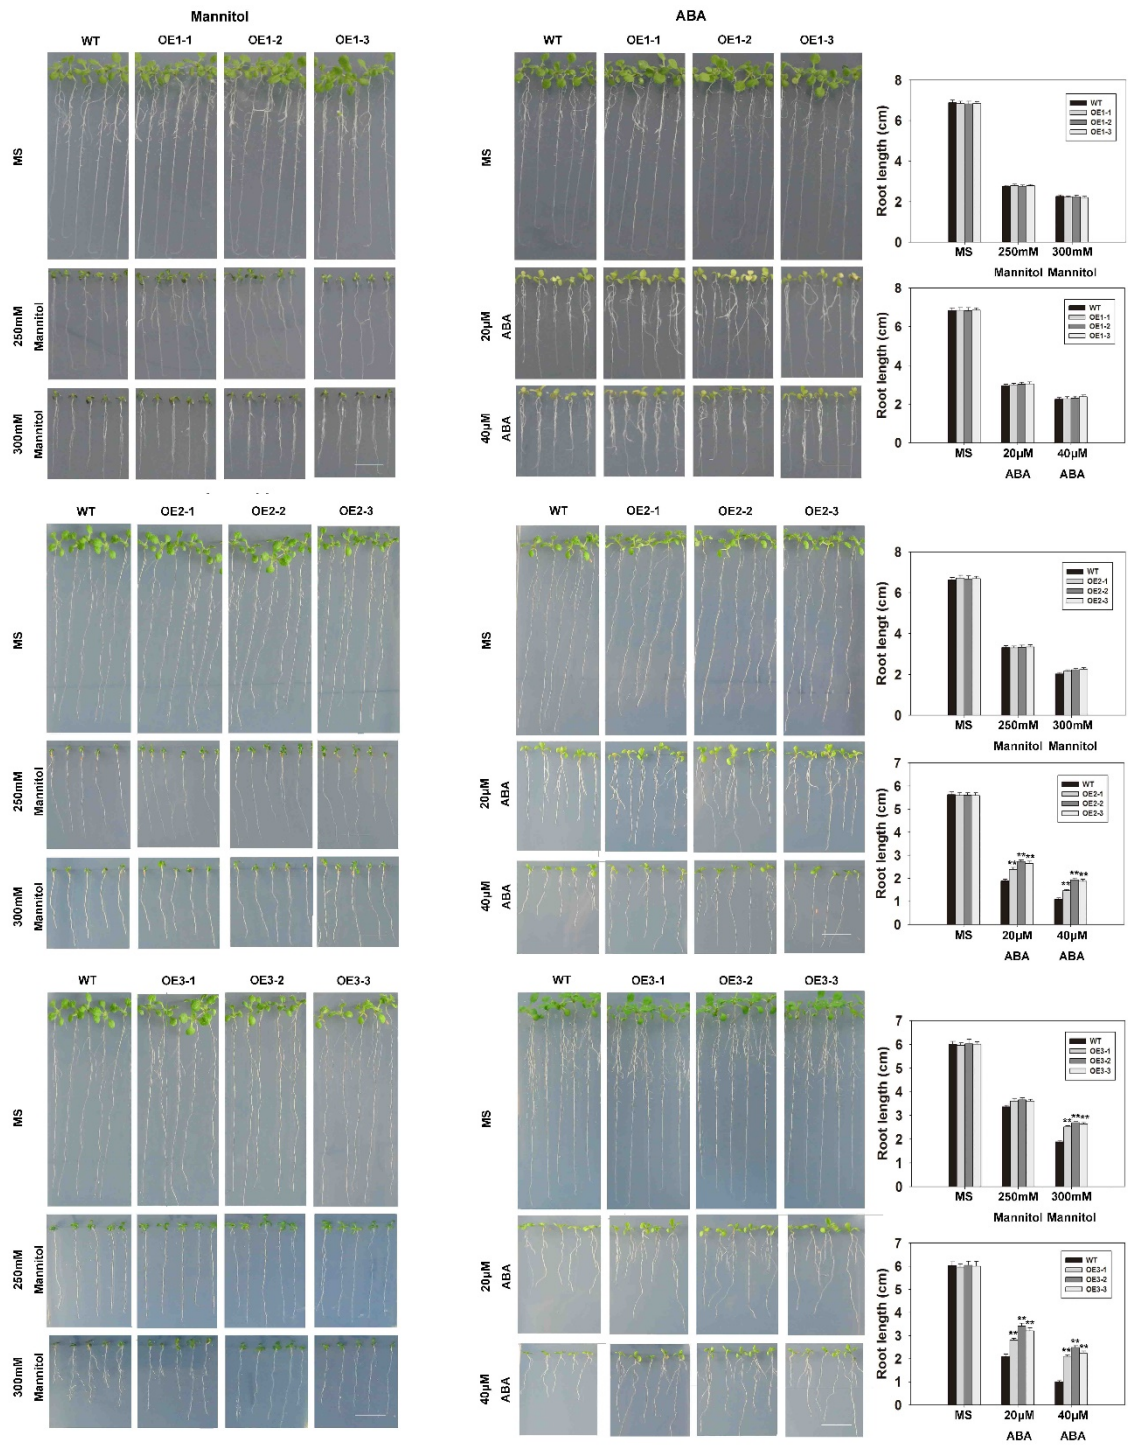

A

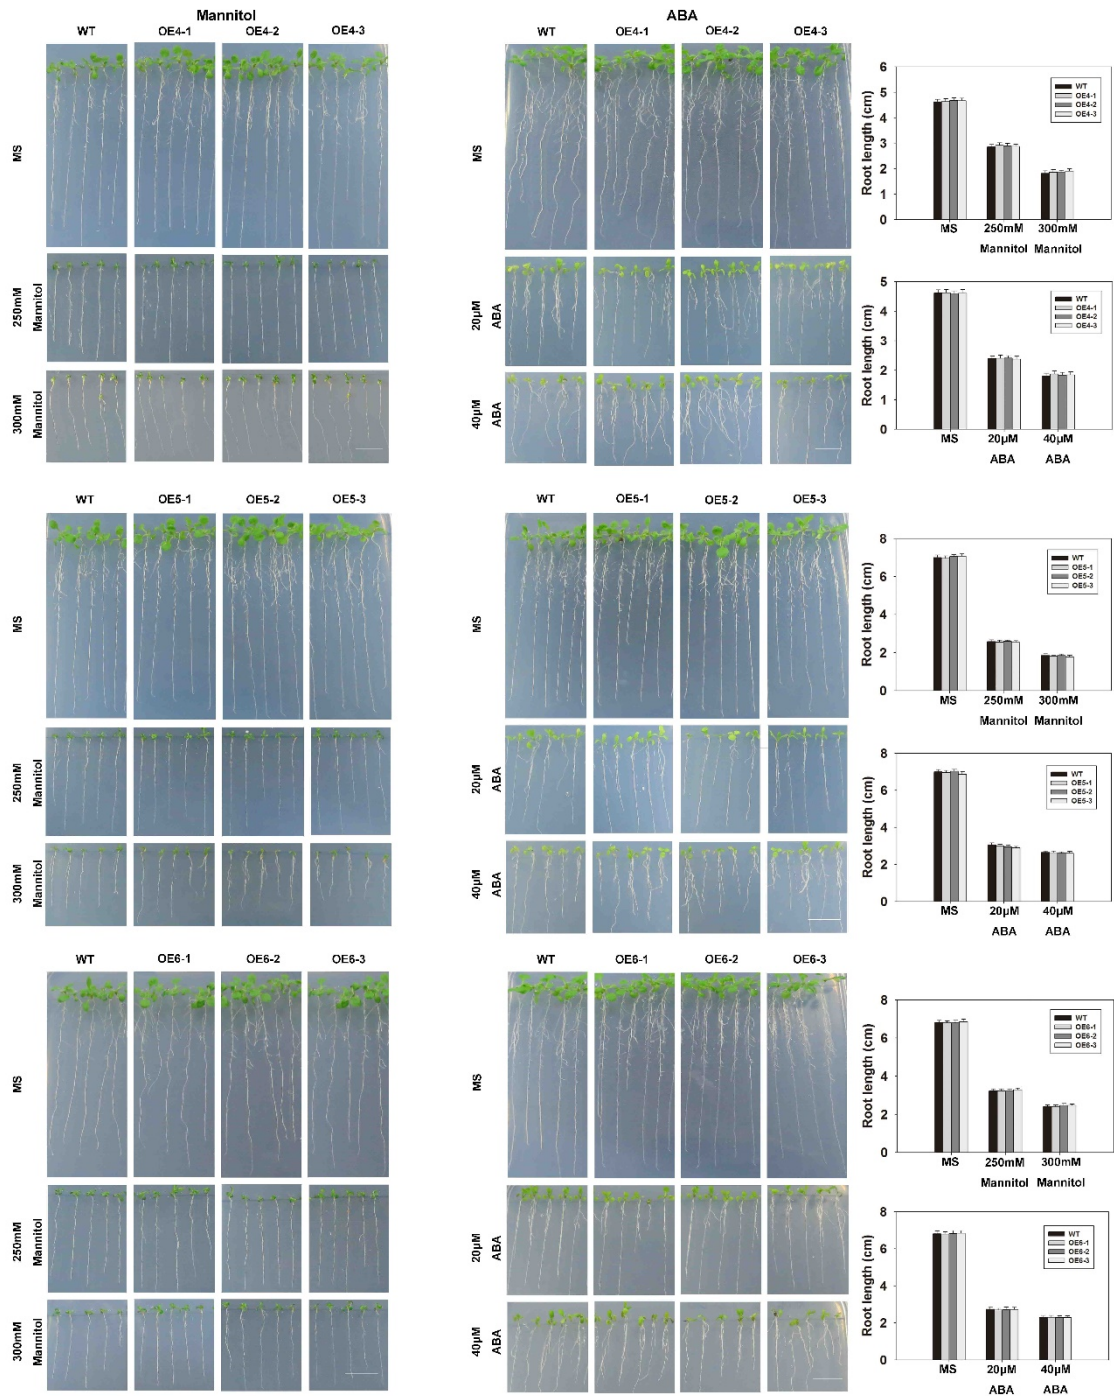

B

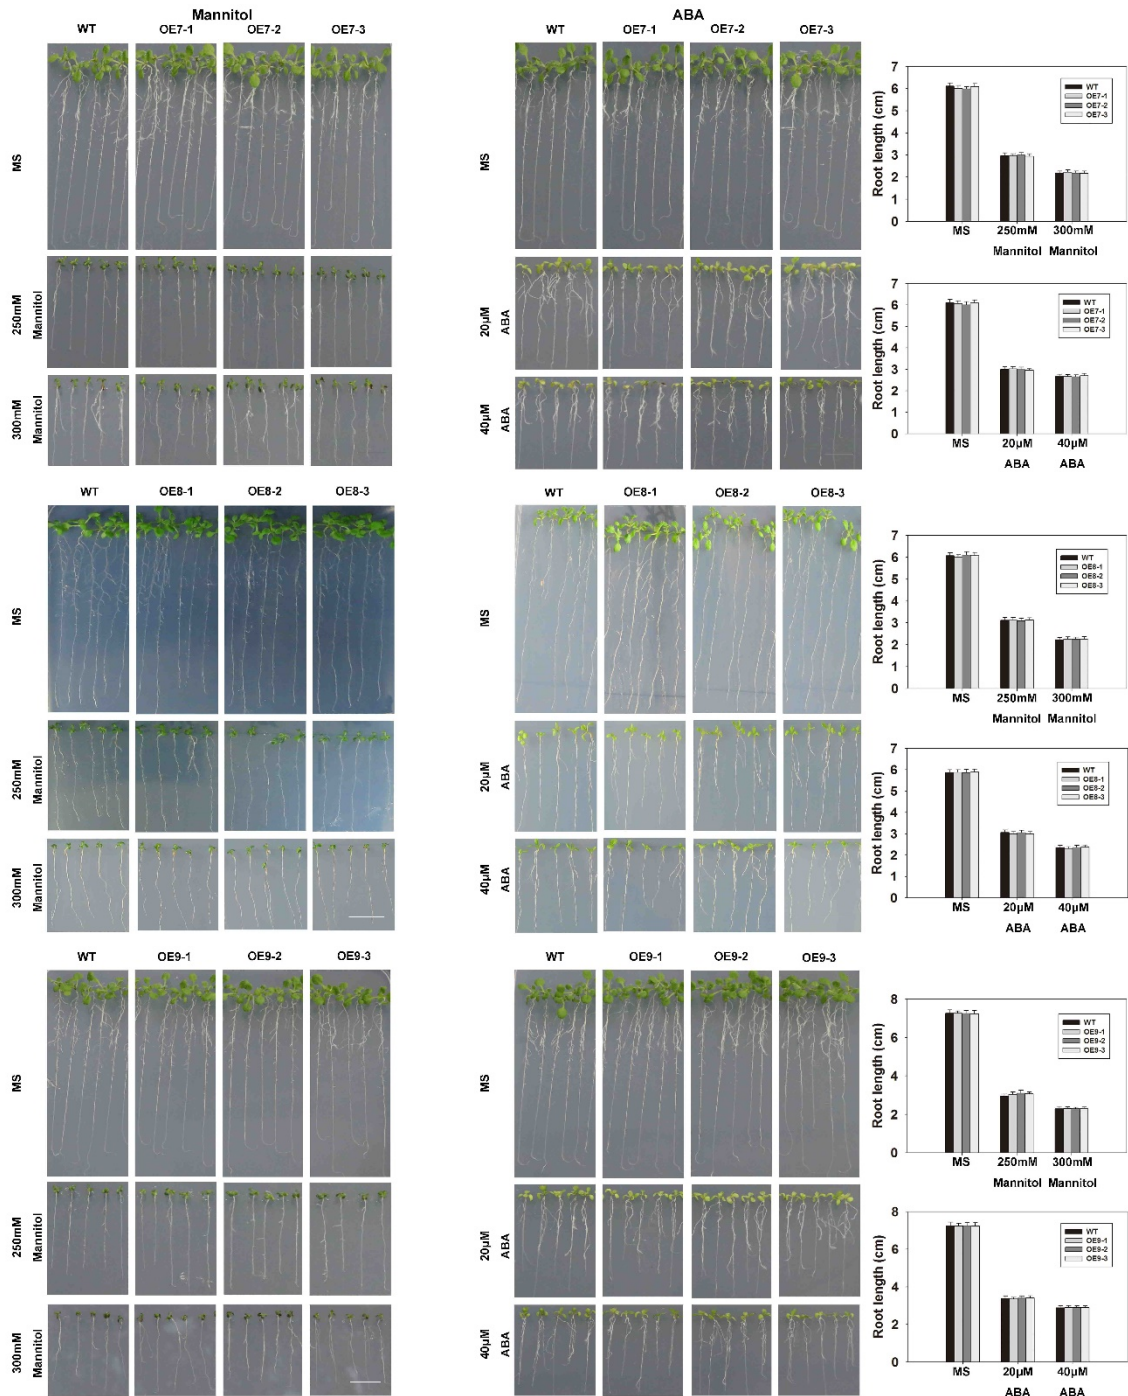

C

**Figure S3.** Photographs and measurements of root length of WT and *ZmASRs* transgenic seedlings at the postgermination stage on 0.5 × MS with different mannitol and ABA. Data shown represent the means (±SE) of three independent experiments (each with 50 seeds for each line). \*\**p* < 0.01 by Student's test. **A:** *ZmASR1*, *ZmASR2* and *ZmASR3* overexpressing lines. **B:** *ZmASR4*, *ZmASR5* and *ZmASR6* overexpressing lines. **C:** *ZmASR7*, *ZmASR8* and *ZmASR9* overexpressing lines.

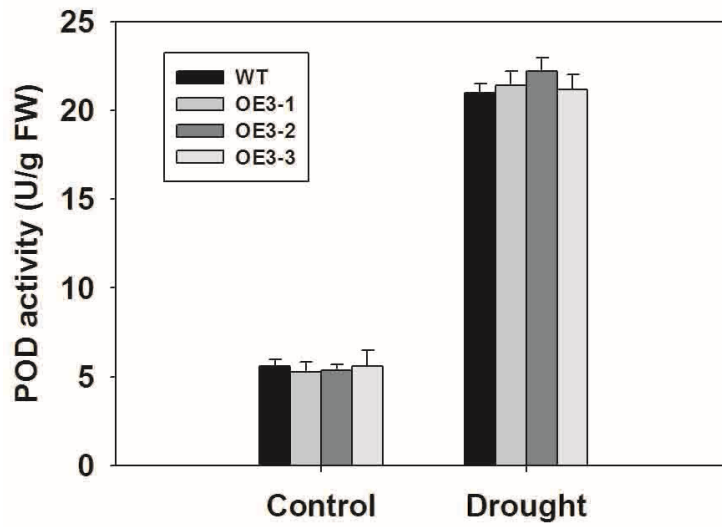

**Figure S4.** Analysis of POD activity of the three *ZmASR3* transgenic lines and WT plants. All samples were measured three independent experiments.

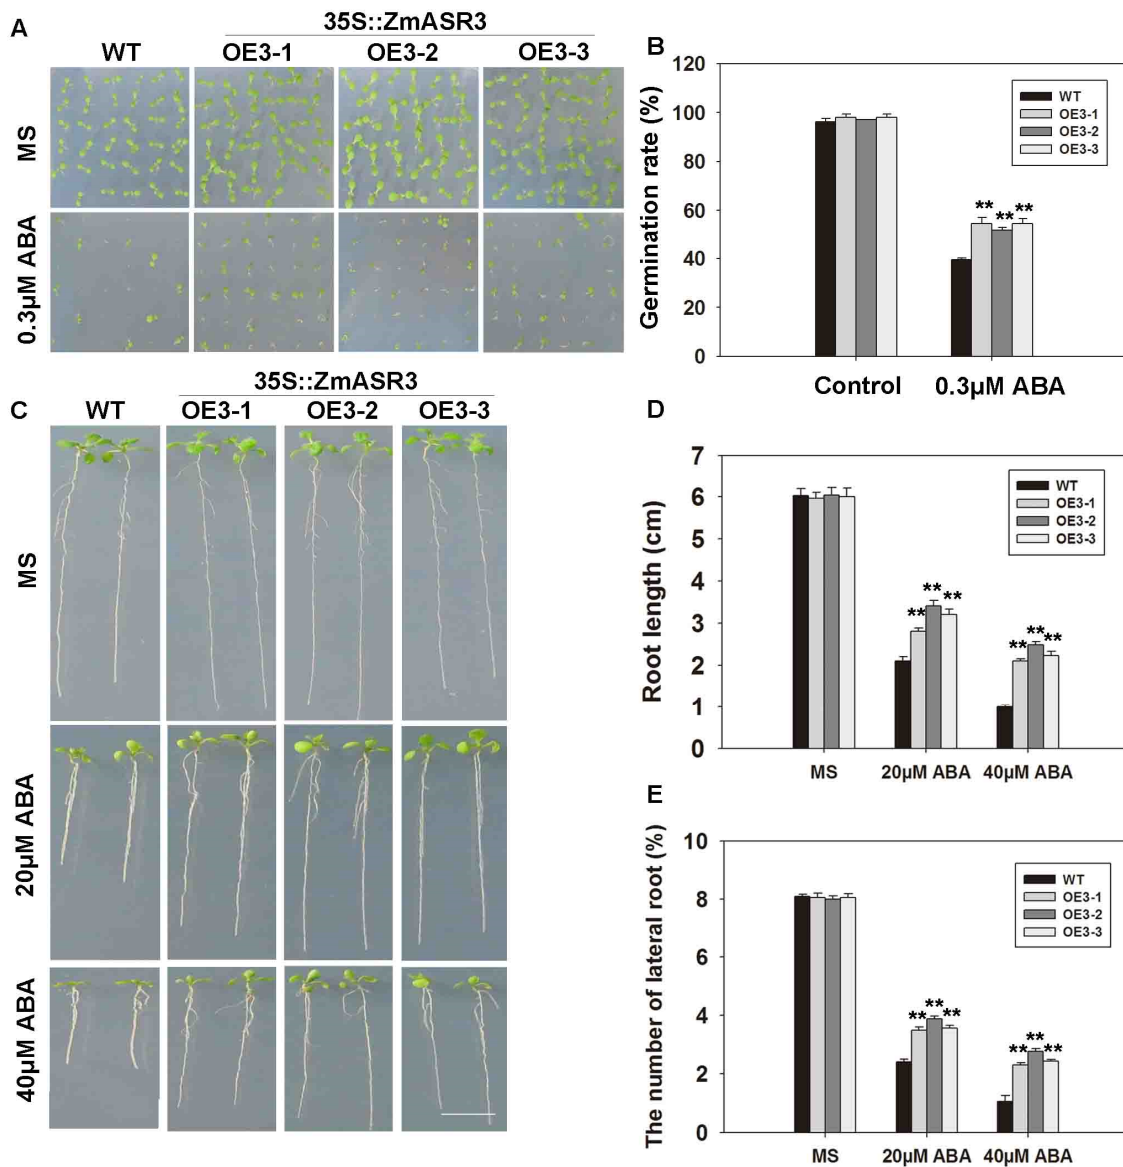



**Figure S5.** ABA sensitivity analysis in *ZmASR3* transgenic and WT plants. (A) Photographs and (B) quantitative evaluation of germination rate at the germination stage of WT and three transgenic lines on  $0.5 \times$  MS, or  $0.5 \times$  MS supplemented with  $0.3 \mu\text{M}$  ABA. Photographs (C) and measurements of root length (D) and lateral root number (E) of WT and transgenic seedlings at the postgermination stage on  $0.5 \times$  MS with  $20 \mu\text{M}$  or  $40 \mu\text{M}$  ABA. Data shown represent the means ( $\pm$ SE) of three independent experiments (each with 100 seeds for each line).  $**p < 0.01$  by Student's test. Scale bar = 1 cm.

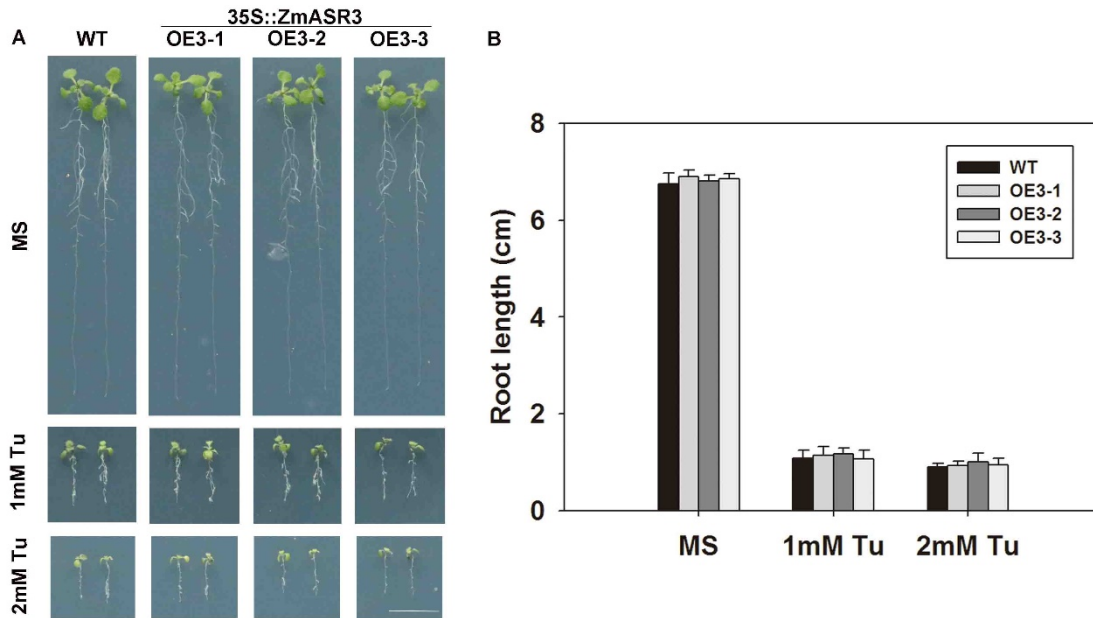

**Figure S6.** Effects of Tu in *ZmASR3* overexpressing transgenic lines and WT plants. Photographs (A) and measurements of root length (B) of WT and transgenic seedlings at the postgermination stage on  $0.5 \times$  MS with 1 mM or 2 mM Tu. All samples were measured in triplicate.
